# Supplementary material for: Revealing the sub-50 ms electrochemical conversion of silver halide nanocolloids by stochastic electrochemistry and optical microscopy
Source: Royal Society of Chemistry journal article supplement (doi:10.1039/d0nr03799k), 2020-01-01
Supplement: d0nr03799k1.pdf [file d0nr03799k1.pdf]

## Electronic Supplementary Information

### **Revealing the sub-50ms electrochemical conversion of silver halide nanocolloids by stochastic electrochemistry and optical microscopy**

Jean-François Lemineur,<sup>1</sup> Jean-Marc Noël,<sup>1</sup> Catherine Combellas,<sup>1</sup> Frédéric Kanoufi<sup>1,\*</sup>

<sup>1</sup> Université de Paris, ITODYS, CNRS, F-75006, Paris, France.

### 1. High frequency recording of AgX NPs EC collisions on Au UME

Examples of other nanoimpacts recorded at 100 kHz with a current amplifier are shown below to evidence the multistep collisions of single AgX NPs within an interval of 10ms maximum.

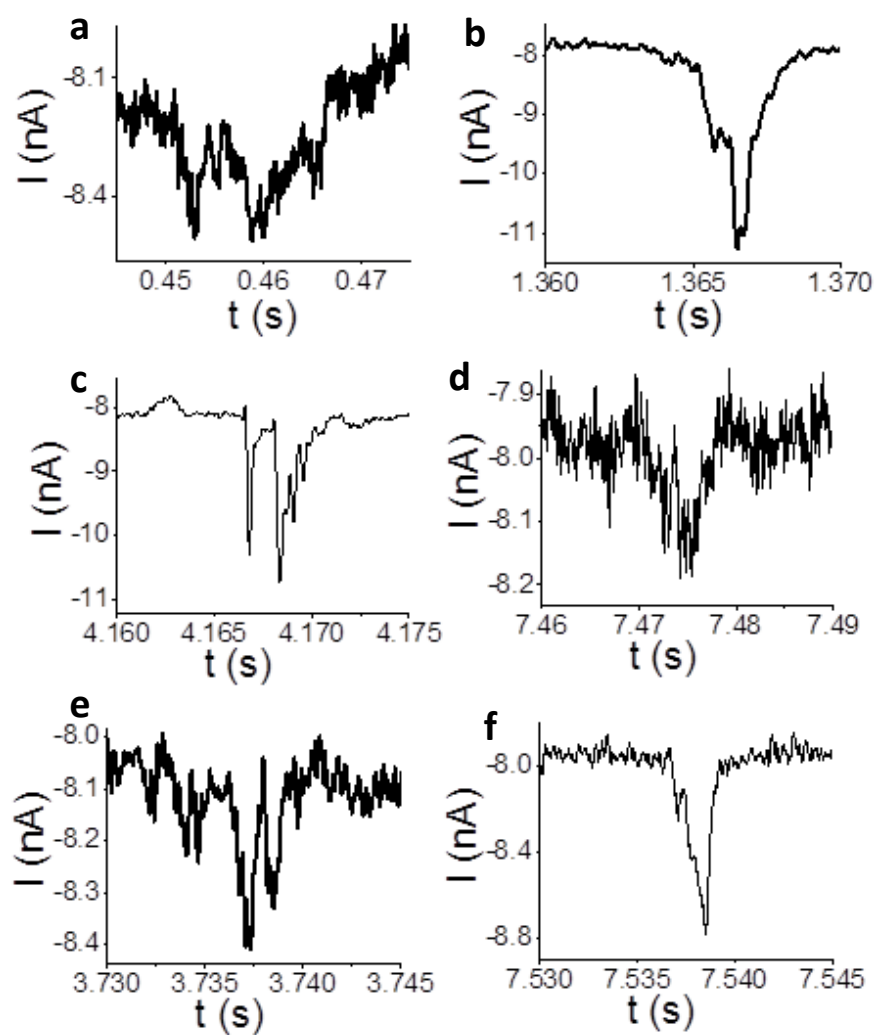

**Figure ESI 1.** Electrochemical impact experiments performed at a 25 $\mu$ m diameter gold UME in a colloidal solution of AgX NPs by applying -0.7V vs Pt and at an acquisition frequency of 100 kHz.

## 2. Optical monitoring of AgX NP EC collisions on BALM electrode

Example of larger surface area ( $12.5 \times 15.6 \mu\text{m}^2$ ) image recorded during the optical monitoring of the same electrochemical experiment presented in Figures 4b and c: individual AgX NPs (dark features in red circles) from a colloidal solution are electrochemically transformed into Ag NPs (bright features in blue circles). The NP density,  $0.1 \text{ NP}/\mu\text{m}^2$ , from such image is comparable to the estimate from Figures 4b and c, as well as the proportion of Ag NPs (25%). The same analysis over the largest image area,  $2100 \mu\text{m}^2$  (not shown), presents a similar density of NPs,  $0.1 \pm 0.02 \text{ NP}/\mu\text{m}^2$ , within the total experiment duration.

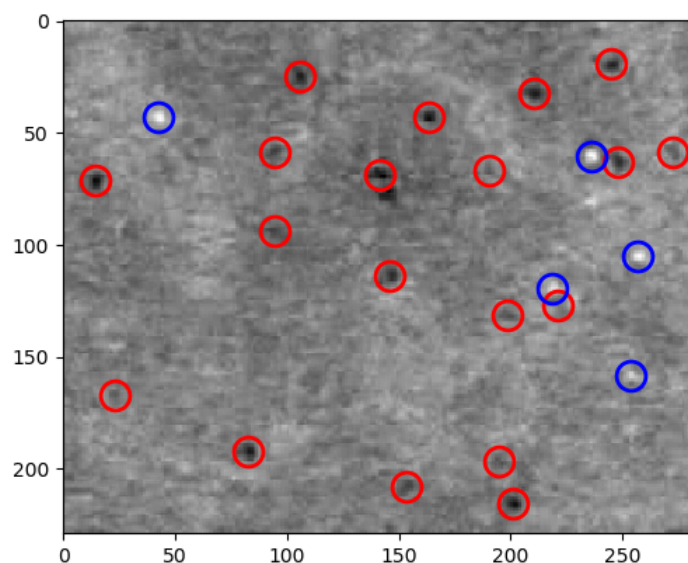

**Figure ESI 2.** Optical image ( $12.5 \times 15.6 \mu\text{m}^2$ ) recorded during the EC of AgX NPs (dark features in red circles) into Ag NPs (bright features in blue circles) performed in a microdroplet of colloidal solution of AgX NPs deposited onto a BALM sampled polarized at  $-0.8 \text{ V}$  vs Pt from the same experiment as that provided in Figure 4b in the manuscript.

### 3. Comsol model of the AgX to Ag NP conversion with electron hopping

The theoretical framework proposed by Compton et al.<sup>1</sup> for the diffusion controlled transport of an analyte inside a nanoparticle is complemented with an electron hopping mechanisms to accelerate the NP conversion inside the particle, as described earlier.<sup>2</sup>

Briefly the transient situation is modeled in the 2D axisymmetric geometry. Only the transport reaction process is considered within a truncated sphere of radius  $r_{NP}=d_{NP}/2$  filled with AgX at a concentration  $[AgX]^* = 40 \text{ mol/dm}^3$ . As depicted below, the truncated sphere is tangent to the electrode, the truncated part, of height  $\varepsilon$ , corresponds to region of the sphere that would be within tunneling distance from the electrode ( $\varepsilon < 2\text{nm}$ ).

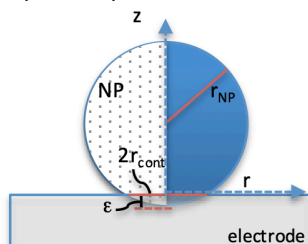

The  $AgX \rightarrow Ag + X^-$  conversion is then initiated at the electrode-NP contact line, by imposing  $[AgX]_{z=0, \text{electrode-NP}} = 0$ . It proceeds by the apparent diffusive transport of AgX (formally  $Ag^+$  and  $X^-$ , here limited by  $Ag^+$ ,  $D = 10^{-11} \text{ cm}^2/\text{s}$ ) within the NP, while imposing a “no flux” condition at the NP outer interface. The model considers only one species, AgX, of concentration  $[AgX]$ , while:

$$[Ag] = [AgX]^* - [AgX].$$

The propagation of the reaction within the NPs through an electron hopping mechanism was considered as a first approximation model of a propagating interface. It was modeled through a homogeneous chemical reaction, of rate  $k_{ex}$ , for which the Ag material obtained by conversion of AgX serves as a support material to convert AgX:

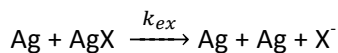

The overall process is simulated by solving the diffusion equation for AgX assorted by this homogeneous transformation:

$$\frac{\partial [AgX]}{\partial t} = D \left( \frac{\partial^2 [AgX]}{\partial r^2} + \frac{1}{r} \frac{\partial [AgX]}{\partial r} + \frac{\partial^2 [AgX]}{\partial z^2} \right) - k_{ex} [AgX] \frac{[Ag]}{[AgX]^*}$$

To accommodate for the propagation of the AgX/Ag interface in the NP (large concentration gradient within a  $< 2\text{nm}$  moving interface), the NP outer interface and NP-electrode contact interface are meshed with a maximum element size of  $0.1\text{nm}$  propagated through a boundary layer mesh (20 layers with geometrical increment 1.02) allowing a dense element distribution along these interfaces normal direction. Overall it consists of up to  $7 \times 10^5$  meshing elements in a  $150\text{nm}$  NP.

The simulation was run by COMSOL 5.2 version on desktop computer equipped with a  $3.6\text{GHz}$  core processor with  $8 \text{ GB}$  RAM operating under  $64\text{-bit}$  Windows system.

### References

<sup>1</sup> H. Le, C. Lin, E. Kätelhön, R.G. Compton, *Electrochim. Acta*, 2019, **298**, 778-787.

<sup>2</sup> J.-F. Lemineur, J.-M. Noël, A. Courty, D. Ausserré, C. Combellas, F. Kanoufi, *J. Am. Chem. Soc.*, 2020, **142**, 7937-7946.
